# Supplementary material for: Eating Patterns and Food Choices of Latvian Infants during Their First Year of Life
Source: Medicina (Kaunas). 2018 Mar 23;54(1):7. doi: 10.3390/medicina54010007 (PMC6037245; doi:10.3390/medicina54010007)
Supplement: Supplementary file 1 [file medicina-54-00007-s001.pdf]

Table S1. Consumption of food groups in relation with mother's education in the infant's age group before 5.9 months.

| Food group                | University degree |          | Secondary education |          | Primary education or none |          | P for trend |
|---------------------------|-------------------|----------|---------------------|----------|---------------------------|----------|-------------|
|                           | Consumption       | CI95%    | Consumption         | CI95%    | Consumption               | CI95%    |             |
| <b>Vegetables</b>         | 13% (n=8)         | 7% - 23% | 7% (n=3)            | 2% - 19% | 7% (n=1)                  | 1% - 30% | 0.341       |
| <b>Potatoes</b>           | 6% (n=4)          | 2% - 15% | 10% (n=4)           | 4% - 22% | 7% (n=1)                  | 1% - 30% | 0.767       |
| <b>Fruits and berries</b> | 6% (n=4)          | 2% - 15% | 5% (n=2)            | 1% - 16% | 7% (n=1)                  | 1% - 30% | 0.912       |
| <b>Grains</b>             | 3% (n=2)          | 1% - 11% | 5% (n=2)            | 1% - 16% | 13% (n=2)                 | 4% - 38% | 0.153       |
| <b>Meat</b>               | 2% (n=1)          | 0% - 8%  | 2% (n=1)            | 0% - 12% | 7% (n=1)                  | 1% - 30% | 0.318       |
| <b>Fish</b>               | 0% (n=0)          | 0% - 6%  | 0% (n=0)            | 0% - 8%  | 7% (n=1)                  | 1% - 30% | 0.046       |
| <b>Cow's milk</b>         | 0% (n=0)          | 0% - 6%  | 5% (n=2)            | 1% - 16% | 7% (n=3)                  | 7% - 45% | 0.067       |
| <b>Dairy</b>              | 3% (n=2)          | 1% - 11% | 0% (n=0)            | 0% - 8%  | 7% (n=1)                  | 1% - 30% | 0.868       |
| <b>Eggs</b>               | 0% (n=0)          | 0% - 6%  | 0% (n=0)            | 0% - 8%  | 0% (n=0)                  | 0% - 20% | 0.151       |
| <b>Legumes</b>            | 0% (n=0)          | 0% - 6%  | 0% (n=0)            | 0% - 8%  | 7% (n=1)                  | 1% - 30% | 0.046       |
| <b>Fats</b>               | 5% (n=3)          | 2% - 13% | 0% (n=0)            | 0% - 8%  | 7% (n=1)                  | 1% - 30% | 0.772       |

Table S2. Consumption of food groups in relation with mother's education in the infant's age group above 6 months.

| Food group                | University degree |           | Secondary education |           | Primary education or none |           | P for trend |
|---------------------------|-------------------|-----------|---------------------|-----------|---------------------------|-----------|-------------|
|                           | Consumption       | CI95%     | Consumption         | CI95%     | Consumption               | CI95%     |             |
| <b>Vegetables</b>         | 90% (n=77)        | 81% - 94% | 84% (n=43)          | 72% - 92% | 67% (n=6)                 | 35% - 88% | 0.074       |
| <b>Potatoes</b>           | 86% (n=74)        | 77% - 91% | 84% (n=43)          | 72% - 92% | 78% (n=7)                 | 45% - 94% | 0.545       |
| <b>Fruits and berries</b> | 79% (n=68)        | 69% - 86% | 82% (n=42)          | 70% - 90% | 89% (n=8)                 | 57% - 98% | 0.443       |
| <b>Grains</b>             | 88% (n=76)        | 80% - 94% | 88% (n=45)          | 77% - 94% | 78% (n=7)                 | 45% - 94% | 0.539       |
| <b>Meat</b>               | 72% (n=62)        | 62% - 80% | 75% (n=38)          | 61% - 84% | 78% (n=7)                 | 45% - 94% | 0.662       |
| <b>Fish</b>               | 37% (n=32)        | 28% - 48% | 31% (n=16)          | 20% - 45% | 56% (n=5)                 | 27% - 81% | 0.789       |
| <b>Cow's milk</b>         | 62% (n=53)        | 51% - 71% | 71% (n=36)          | 57% - 81% | 78% (n=7)                 | 45% - 94% | 0.187       |
| <b>Dairy</b>              | 76% (n=65)        | 66% - 83% | 80% (n=41)          | 68% - 89% | 89% (n=8)                 | 57% - 98% | 0.308       |
| <b>Eggs</b>               | 41% (n=35)        | 31% - 51% | 47% (n=24)          | 34% - 60% | 67% (n=6)                 | 35% - 88% | 0.737       |
| <b>Legumes</b>            | 30% (n=26)        | 22% - 41% | 28% (n=14)          | 17% - 41% | 11% (n=1)                 | 2% - 44%  | 0.310       |
| <b>Fats</b>               | 73% (n=63)        | 63% - 81% | 75% (n=38)          | 61% - 84% | 67% (n=6)                 | 35% - 88% | 0.862       |
